# Supplementary material
Source: publisher figshare collection journal article supplement (https://frontiersin.figshare.com/ndownloader/files/25314362)
Supplement: Supplementary file [file 25314362]

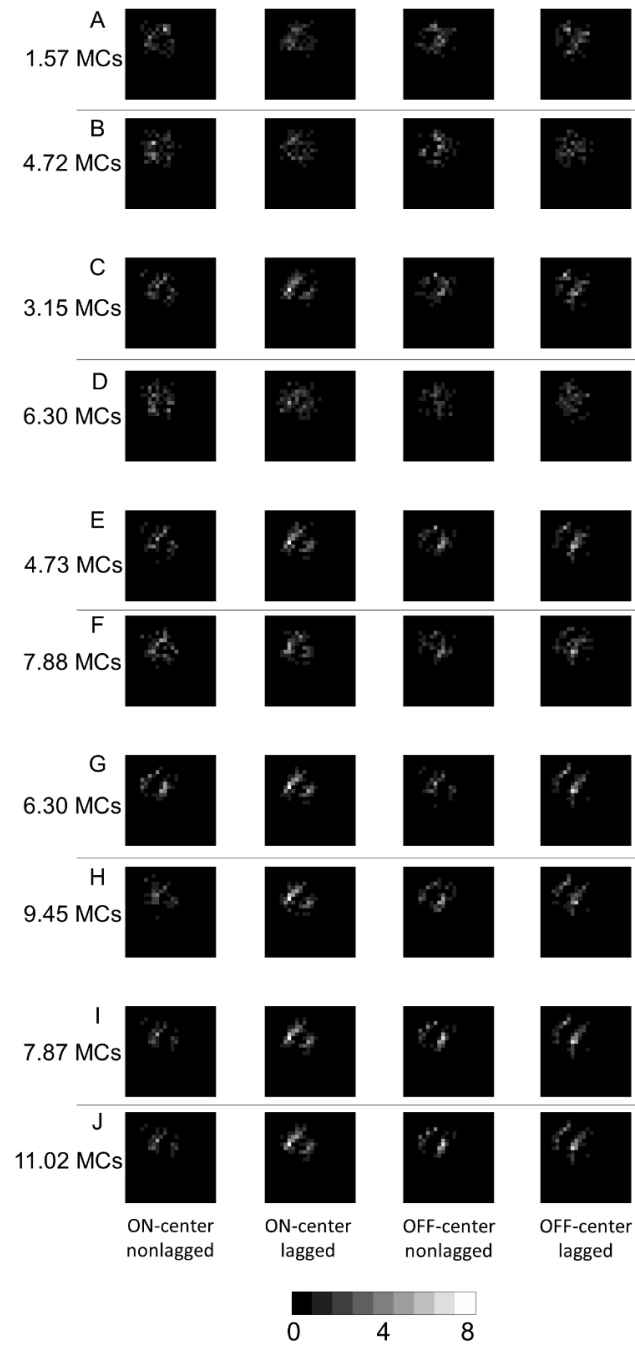

Supplementary Figure 4. Spatial patterns of four types of afferent synaptic inputs.

Preferred orientations are determined by the spatial arrangement of four types of inputs. Spatiotemporal receptive field are calculated by the convolution with LGN spatiotemporal receptive fields. Cortical spatiotemporal receptive fields shown in Fig. 11 are obtained from these synaptic inputs. The gradation indicates the number of inputs. The white indicates 8 synaptic inputs or more, whereas the black indicates 0 input.
